# Supplementary material for: A new detection mode for gold nanoparticle-linked immunosorbent assay (GNLISA) based on a clock reaction: instrument- and enzyme-free visual quantitative detection of prostate-specific antigen (PSA)
Source: Royal Society of Chemistry journal article supplement (doi:10.1039/d3sd00058c), 2023-01-01
Supplement: d3sd00058c1.pdf [file d3sd00058c1.pdf]

## Supporting Information

### **A New Detection Mode for Gold Nanoparticles-Linked Immunosorbent Assay(GNLISA) Based on Clock Reaction: Instrument- and Enzyme-free Visual Quantitative Detection of Prostate-Specific Antigen(PSA)**

Tianxiang Wu\* and Xiao-Yuan Li

*Department of Chemistry, The Hong Kong University of Science and Technology,  
ClearWater Bay, Kowloon, Hong Kong S.A.R., The People's Republic of China*

#### **Authors' emails:**

Tianxiang Wu: [twuas@connect.ust.hk](mailto:twuas@connect.ust.hk)

Xiao-Yuan Li: [chxyli@ust.hk](mailto:chxyli@ust.hk)

**It contains 3 figures, 3 tables, and 5 pages.**

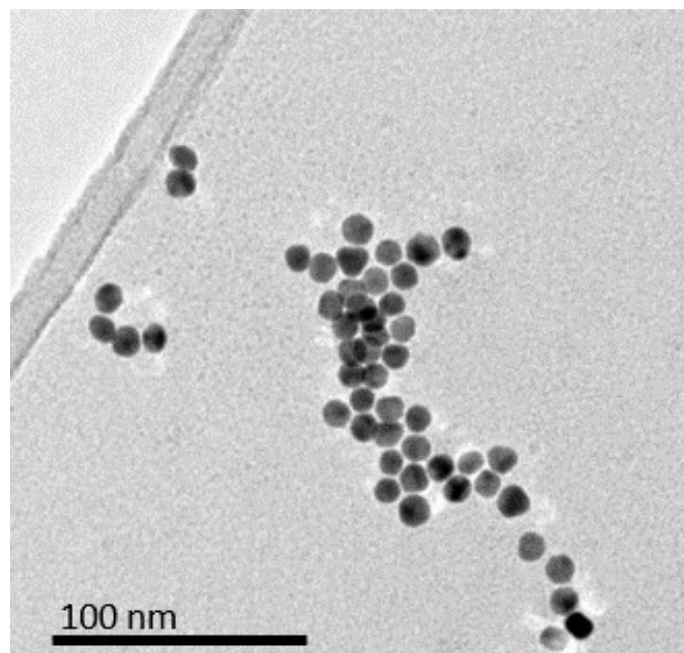

Fig. S1. TEM of the prepared AuNPs with an average size of *ca.* 13 nm

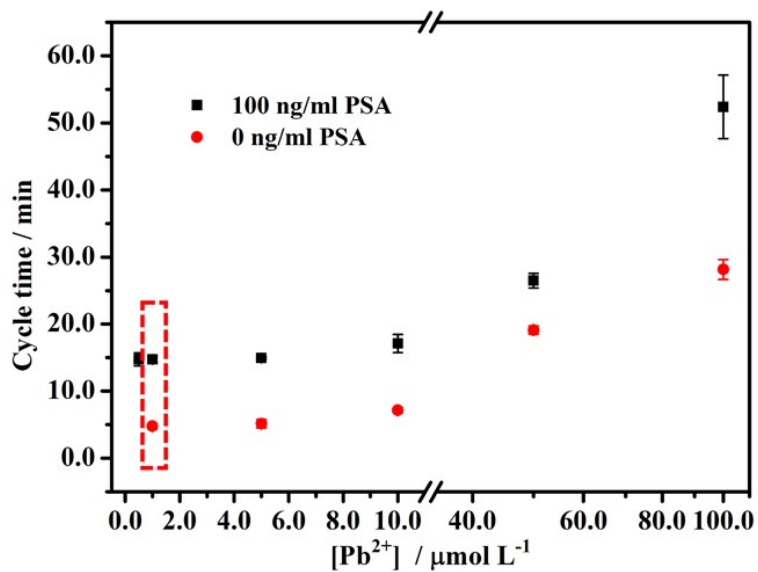

Fig. S2 The effect of Pb<sup>2+</sup> concentration on the cycle time. The conditions are 75 μL of pH 7.96 buffer (B-R buffer), 10 μL of different concentrations of Pb<sup>2+</sup>, 5 μL of 0.10 M CTAB, 10 μL of 0.10 M Na<sub>2</sub>S<sub>2</sub>O<sub>3</sub>, 3.5 μL of 0.450 mM MB<sup>+</sup>, 40.0 min of leaching time, 20 μL of ω = 1.0% NaBH<sub>4</sub>, and the temperature is at 22°C.

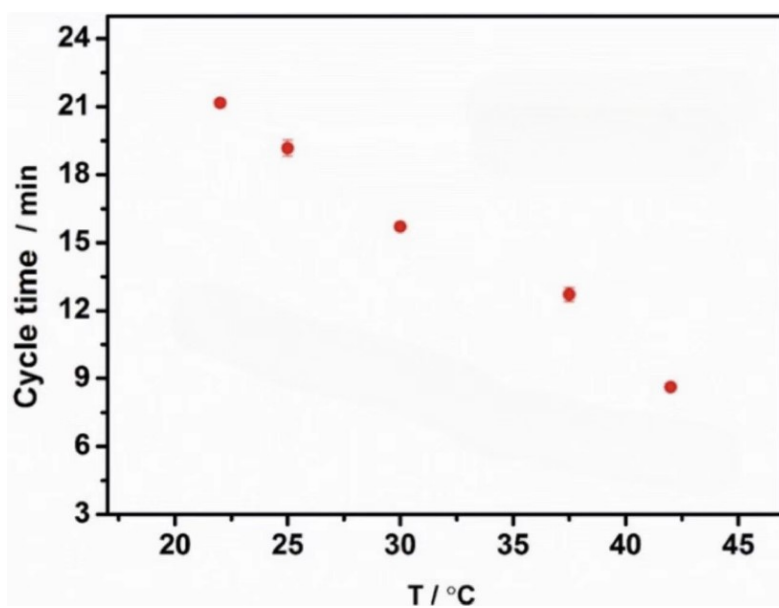

Fig. S3. The effect of the temperature on the cycle time.

Table S1. Cycle times of the blank experiment for different observers

| Observer No.            | Gender | Cycle time for the blank experiment (min) |
|-------------------------|--------|-------------------------------------------|
| 1                       | M      | 6.3                                       |
| 2                       | M      | 6.4                                       |
| 3                       | F      | 6.8                                       |
| 4                       | F      | 6.8                                       |
| One of the authors(TXW) | M      | 6.1                                       |

Table S2. Comparison with other colorimetric detection methods for PSA

| Linear range<br>(ng/ml) | LOD<br>(ng/ml) | Instrument-free<br>quantitative<br>detection | Enzyme-free | Ref.                 |
|-------------------------|----------------|----------------------------------------------|-------------|----------------------|
| —                       | 0.0001         | No                                           | Yes         | 1                    |
| 0.01-20                 | 0.009          | No                                           | No          | 2                    |
| 0.1-100                 | 0.02           | No                                           | Yes         | 3                    |
| 0.001-1                 | 0.001          | No                                           | Yes         | 4                    |
| 0.25-2500               | 0.23           | No                                           | Yes         | 5                    |
| 0.00001-0.1             | 0.0000011      | No                                           | Yes         | 6                    |
| 42-900                  | 2.3            | No                                           | Yes         | 7                    |
| 0.1-5                   | 0.03           | No                                           | Yes         | 8                    |
| 0.01-2                  | 0.00103        | No                                           | No          | 9                    |
| <b>1-100</b>            | <b>0.96</b>    | <b>Yes</b>                                   | <b>Yes</b>  | <b>this<br/>work</b> |

Table S3. Cycle times for individual interferent alone (a to f) and PSA + interferent (g to m)

| Sample                              | Cycle time (min) | Standard deviation |
|-------------------------------------|------------------|--------------------|
| a:1000 ng/ml UA                     | 5.9              | 0.2                |
| b:1000 ng/ml glucose                | 5.8              | 0.1                |
| c:1000 ng/ml AA                     | 6.2              | 0.2                |
| d:1000 ng/ml IgG                    | 5.7              | 0.1                |
| e:1000 ng/ml CEA                    | 6.0              | 0.2                |
| f:1000 ng/ml AFP                    | 5.9              | 0.2                |
| g:25 ng/ml PSA                      | 13.4             | 0.1                |
| h:1000 ng/ml UA + 25 ng/ml PSA      | 13.6             | 0.2                |
| i:1000 ng/ml glucose + 25 ng/ml PSA | 13.5             | 0.2                |
| j:1000 ng/ml AA + 25 ng/ml PSA      | 13.3             | 0.3                |
| k:1000 ng/ml IgG + 25 ng/ml PSA     | 13.4             | 0.5                |
| l:1000 ng/ml CEA + 25 ng/ml PSA     | 13.4             | 0.4                |
| m:1000 ng/ml AFP + 25 ng/ml PSA     | 13.9             | 0.2                |

## References

1. J. Hahn, E. Kim, Y. You, and Y. J. Choi, *Analyst*, 2019, **144**, 4439–4446.
2. P. Karami, H. Khoshshafar, M. Johari-Ahar, F. Arduini, A. Afkhami, and H. Bagheri, *Spectrochim. Acta A Mol. Biomol. Spectrosc.*, 2019, **222**, 117218–117225.
3. O. H. Shayesteh, and R. Ghavami, *Spectrochim. Acta A Mol. Biomol. Spectrosc.*, 2020, **226**, 117644–117650.
4. T. Sun, N. Xia, F. Yuan, X. Liu, Y. Chang, S. Liu, and L. Liu, *Microchim. Acta*, 2020, **187**, 1–7.
5. X. H. Pham, E. Hahm, K. H. Huynh, B. S. Son, H. M. Kim, and B. H. Jun, *Biochip J.*, 2020, **14**, 158–168.
6. L. Cid-Barrio, J. Ruiz Encinar, and J. M. Costa-Fernández, *Sensors*, 2020, **20**, 5287–5301.
7. S. Lin, J. Zhong, Y. Chi, Y. Chen, M. S. Khan, and J. Shen, *Microchim. Acta*, 2021, **188**, 1–7.

8. W. Wang, J. Liu, L. A. Wu, C. N. Ko, X. Wang, C. Lin, J. Liu, L. Ling, and J. Wang, *Anal. Chim. Acta.*, 2022, **1195**, 339479–339486.
9. S. Wu, C. Wang, J. Wang, and H. Tan, *J. Mater. Chem. B*, 2020, **8**, 10662–10669.
